# Supplementary material
Source: PubMed Central journal article supplement (PMC7855479)
Supplement: NIHMS1646968-supplement-Supplementary_Files.pdf [file NIHMS1646968-supplement-Supplementary_Files.pdf]

**Supplementary Figure S1.** Association of *MYCN* or *MYC* expression with that of key fatty acid synthesis genes in prostate and ovarian cancer TCGA. **(a)** Correlation of *MYCN* gene expression with that of key fatty acid synthesis genes in prostate cancer TCGA (n = 497). **(b)** Correlation of *MYC* gene expression with that of key fatty acid metabolism genes in ovarian cancer TCGA (n = 304). Pearson test was used to determine the correlation coefficient and statistical significance.

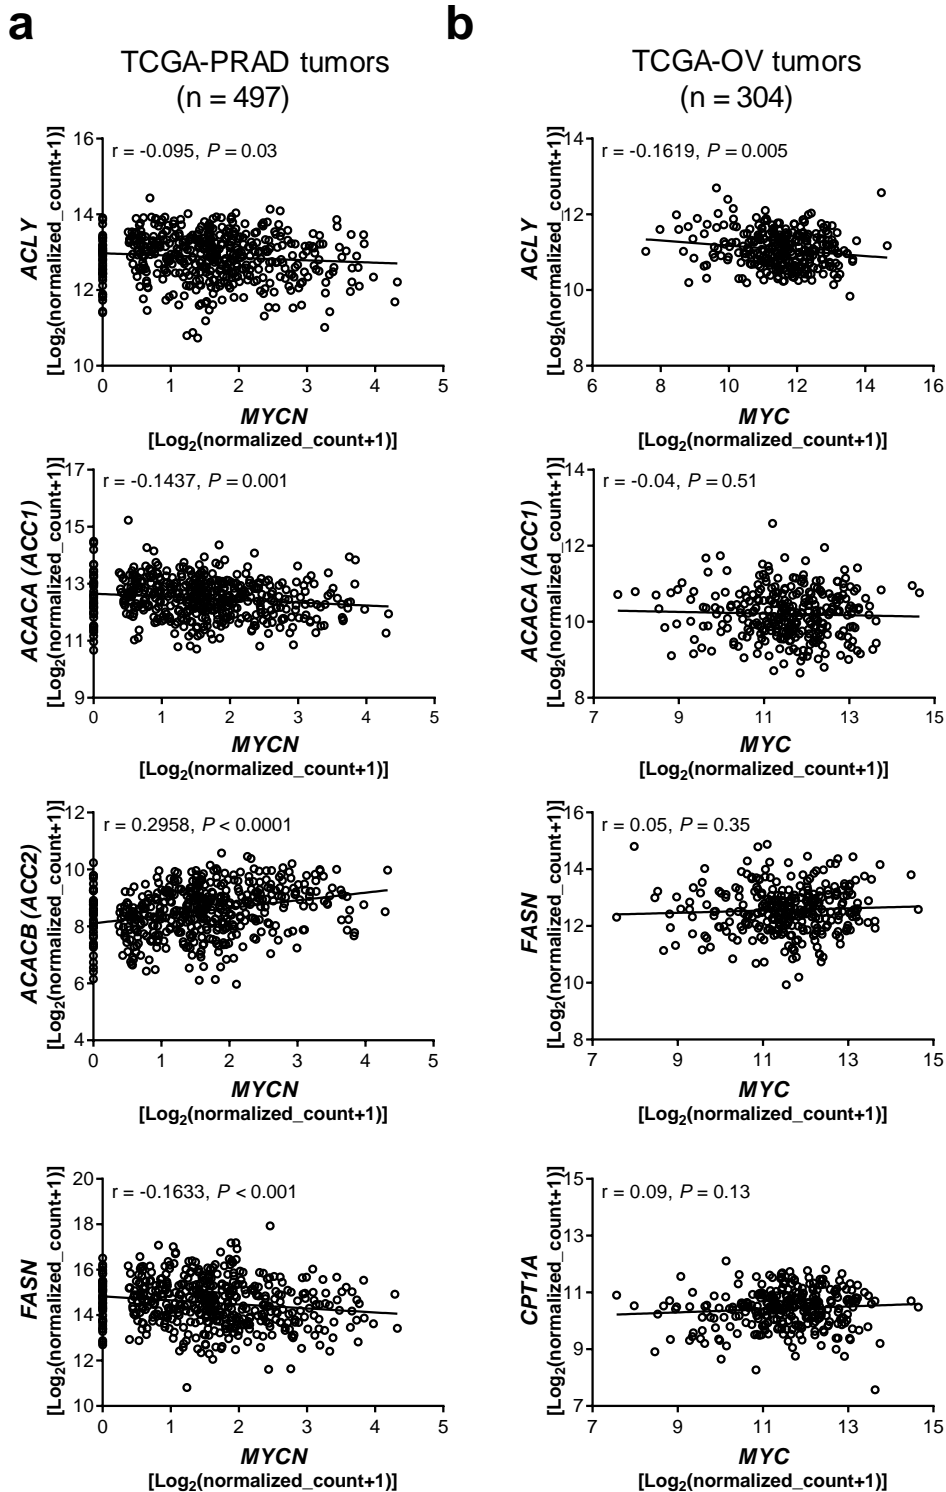

**Supplementary Figure S2.** Putative Myc consensus binding sequences at the promoters of *ACLY*, *ACCI1*, and *FASN*. The primers used for chromatin immunoprecipitation assay are also shown.

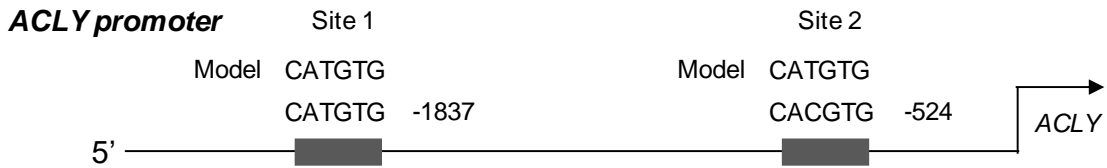

Primers (58°C, 30 s)

Site 1 – (F): 5'-TGACCTCGAACTCAGGTGAT-3'; (R): 5'-CAGATTGCTAGAGCCCAGAA-3'

Site 2 – (F): 5'-CCACACTGGGAAGTATGCTC-3'; (R): 5'-TTAGCCCAACTGGCTGTAAC-3'

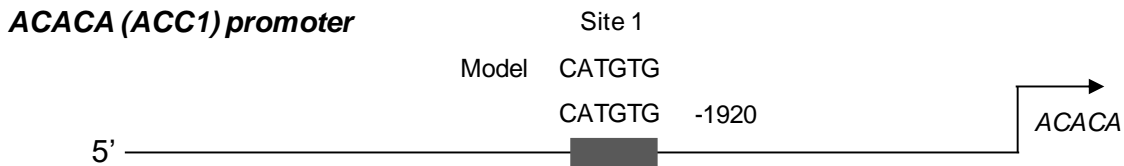

Primer (56°C, 30 s)

Site 1 – (F): 5'-AGTTGGAGGTCTTCATACTACCTG-3'; (R): 5'-CTGTGAGAGACTGTTTTACATTGG-3'

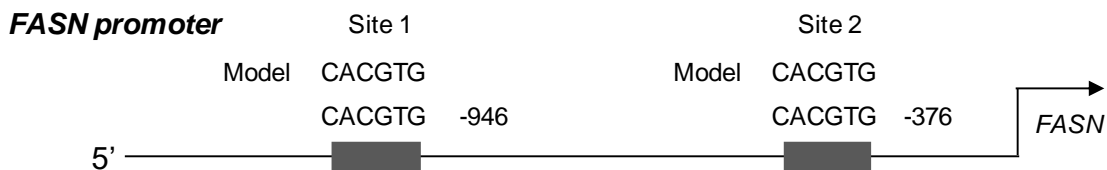

Primers (62°C, 1 min)

Site 1 – (F): 5'-CACACCAGGTGGGTGTCC-3'; (R): 5'-GGAACCCAGACCCGAGAC-3'

Site 2 – (F): 5'-AGTGTGGCCCAAGCATTTC-3'; (R): 5'-GGGGCTGGGACTGAGGAG-3'

**Supplementary Table S1.** Details of patients whose specimens were used for immunohistochemistry of ACLY, ACC1, and c-Myc (data shown in Figure 5).

| <b>S. No.</b> | <b>Sample Type</b> | <b>Sample ID</b> | <b>Age</b> | <b>Race</b> | <b>Stage/Gleason score</b> |
|---------------|--------------------|------------------|------------|-------------|----------------------------|
| 1             | Normal             | PR092            | 50         | White       | N/A                        |
| 2             | Normal             | GB01-6/D384      | 29         | White       | N/A                        |
| 3             | Normal             | GB02-28/E460     | 16         | White       | N/A                        |
| 4             | Normal             | GB75             | 44         | White       | N/A                        |
| 5             | Normal             | PR114            | 17         | White       | N/A                        |
| 1             | PIN                | G815             | 54         | black       | N/A                        |
| 2             | PIN                | HB141            | 63         | White       | N/A                        |
| 3             | PIN                | TP13-S0391       | 66         | White       | N/A                        |
| 4             | PIN                | PR156            | 39         | white       | N/A                        |
| 5             | PIN                | GB103            | 72         | White       | N/A                        |
| 6             | PIN                | PBC-PR-2481      | 60         | White       | N/A                        |
| 7             | PIN                | PBC-PR-2476      | 77         | White       | N/A                        |
| 1             | Adenocarcinoma     | TP13-S0798       | 60         | White       | 3+4=7                      |
| 2             | Adenocarcinoma     | TP12-S0099       | 75         | White       | 3+4=7                      |
| 3             | Adenocarcinoma     | TP11-S1333       | 64         | White       | 3+4=7                      |
| 4             | Adenocarcinoma     | TP11-S1280       | 48         | White       | 4+4=8                      |
| 5             | Adenocarcinoma     | TP11-S0186       | 57         | White       | 4+3=7                      |
| 6             | Adenocarcinoma     | PBC-PR-2482      | 68         | White       | 3+4=7                      |
| 7             | Adenocarcinoma     | PBC-PR-2477      | 47         | White       | 3+4=7                      |
| 8             | Adenocarcinoma     | PBC-PR-2480      | 67         | White       | 3+4=7                      |
| 9             | Adenocarcinoma     | PBC-PR-2478      | 58         | White       | Unknown                    |
| 10            | Adenocarcinoma     | PBC-PR-2479      | 70         | White       | 3+4=7                      |

PIN, prostatic intraepithelial neoplasia

**Supplementary Table S2.** Information on patients whose plasma specimens were used for measurement of individual fatty acids by targeted metabolomics.

| <b>S. No.</b> | <b>Sample Type</b> | <b>Sample ID</b> | <b>Age</b> | <b>Race</b> | <b>Stage/Gleason score</b> |
|---------------|--------------------|------------------|------------|-------------|----------------------------|
| 1             | Normal             | PR094            | 54         | White       | N/A                        |
| 2             | Normal             | PR093            | 55         | Hispanic    | N/A                        |
| 3             | Normal             | PR092            | 50         | White       | N/A                        |
| 4             | Normal             | GB01-6/D384      | 29         | White       | N/A                        |
| 5             | Normal             | GB02-28/E460     | 16         | White       | N/A                        |
| 6             | Normal             | GB01-1           | 17         | White       | N/A                        |
| 7             | Normal             | E242             | 25         | Black       | N/A                        |
| 8             | Normal             | EB671            | 22         | white       | N/A                        |
| 9             | Normal             | GB44             | 23         | white       | N/A                        |
| 10            | Normal             | GB28             | 40         | white       | N/A                        |
| 11            | Normal             | G007             | 51         | Unknown     | N/A                        |
| 12            | Normal             | F441             | 17         | white       | N/A                        |
| 13            | Normal             | PR106            | 43         | white       | N/A                        |
| 14            | Normal             | GB75             | 44         | White       | N/A                        |
| 15            | Normal             | FB499            | 39         | White       | N/A                        |
| 16            | Normal             | B1091            | 18         | White       | N/A                        |
| 17            | Normal             | B1120            | 13         | White       | N/A                        |
| 18            | Normal             | B1055            | 16         | White       | N/A                        |
| 19            | Normal             | PR113            | 32         | White       | N/A                        |
| 20            | Normal             | PR114            | 17         | White       | N/A                        |
| 1             | PIN                | G815             | 54         | black       | N/A                        |
| 2             | PIN                | HB141            | 63         | White       | N/A                        |
| 3             | PIN                | I331             | 56         | White       | N/A                        |
| 4             | PIN                | IB570            | 77         | White       | N/A                        |
| 5             | PIN                | JB026            | 69         | White       | N/A                        |
| 6             | PIN                | JB110            | 69         | White       | N/A                        |
| 7             | PIN                | JB290            | 46         | White       | N/A                        |
| 8             | PIN                | JB878            | 63         | White       | N/A                        |
| 9             | PIN                | GB572            | 48         | White       | N/A                        |
| 10            | PIN                | TP09-S0656       | 58         | White       | N/A                        |
| 11            | PIN                | TP13-S0391       | 66         | White       | N/A                        |
| 12            | PIN                | F343             | 47         | White       | N/A                        |
| 13            | PIN                | F173             | 50         | White       | N/A                        |
| 14            | PIN                | E806             | 61         | White       | N/A                        |
| 15            | PIN                | PR155            | 45         | White       | N/A                        |
| 16            | PIN                | PR156            | 39         | white       | N/A                        |
| 17            | PIN                | GB02-53          | 63         | Unknown     | N/A                        |

|    |                |            |    |         |       |
|----|----------------|------------|----|---------|-------|
| 18 | PIN            | PR235      | 57 | White   | N/A   |
| 19 | PIN            | PR157      | 63 | Unknown | N/A   |
| 20 | PIN            | GB103      | 72 | White   | N/A   |
| 1  | Adenocarcinoma | TP13-S0819 | 53 | White   | 3+3=6 |
| 2  | Adenocarcinoma | TP13-S0798 | 60 | White   | 3+4=7 |
| 3  | Adenocarcinoma | TP13-S0020 | 66 | White   | 3+3=6 |
| 4  | Adenocarcinoma | TP12-S0525 | 66 | White   | 3+4=7 |
| 5  | Adenocarcinoma | TP12-S0099 | 75 | White   | 3+4=7 |
| 6  | Adenocarcinoma | TP12-S0008 | 55 | White   | 3+4=7 |
| 7  | Adenocarcinoma | TP11-S1333 | 64 | White   | 3+4=7 |
| 8  | Adenocarcinoma | TP11-S1280 | 48 | White   | 4+4=8 |
| 9  | Adenocarcinoma | TP11-S1150 | 67 | White   | 3+4=7 |
| 10 | Adenocarcinoma | TP11-S0620 | 66 | White   | 3+4=7 |
| 11 | Adenocarcinoma | TP11-S0186 | 57 | White   | 4+3=7 |
| 12 | Adenocarcinoma | TP10-S0888 | 61 | White   | 3+4=7 |
| 13 | Adenocarcinoma | TP10-S0970 | 64 | White   | 4+3=7 |
| 14 | Adenocarcinoma | TP10-S0242 | 64 | White   | 3+4=7 |
| 15 | Adenocarcinoma | TP10-S0040 | 60 | White   | 3+4=7 |
| 16 | Adenocarcinoma | TP08-S0477 | 70 | White   | 3+4=7 |
| 17 | Adenocarcinoma | TP08-S0395 | 68 | White   | 3+4=7 |
| 18 | Adenocarcinoma | TP08-S0148 | 59 | White   | 3+3=6 |

PIN, prostatic intraepithelial neoplasia; N/A, not applicable.

**Supplementary Table S3.** Human plasma fatty acid levels.

| Metabolite                       | Relative amount to internal control<br>(mean $\pm$ SD) |                  |                               | <i>P</i><br>value                                                            |
|----------------------------------|--------------------------------------------------------|------------------|-------------------------------|------------------------------------------------------------------------------|
|                                  | Normal<br>(n=20)                                       | PIN<br>(n=18)    | Adenocarcinoma<br>(ADC, n=18) |                                                                              |
| Myristic acid                    | 1.88 $\pm$ 1.08                                        | 1.52 $\pm$ 0.74  | 2.92 $\pm$ 1.03               | Normal vs. PIN (>0.99)<br>Normal vs. ADC (<0.01)<br>PIN vs. ADC (<0.001)     |
| Palmitic acid                    | 24.68 $\pm$ 8.31                                       | 25.48 $\pm$ 9.27 | 29.48 $\pm$ 7.30              | Normal vs. PIN (>0.99)<br>Normal vs. ADC (0.11)<br>PIN vs. ADC (0.38)        |
| Palmitoleic acid                 | 1.36 $\pm$ 1.18                                        | 1.02 $\pm$ 0.63  | 2.18 $\pm$ 1.41               | Normal vs. PIN (>0.99)<br>Normal vs. ADC (0.04)<br>PIN vs ADC (<0.01)        |
| Stearic acid                     | 2.99 $\pm$ 0.89                                        | 4.12 $\pm$ 1.14  | 3.86 $\pm$ 0.79               | Normal vs. PIN (<0.01)<br>Normal vs. ADC (0.01)<br>PIN vs. ADC (>0.99)       |
| Oleic acid                       | 4.91 $\pm$ 3.52                                        | 5.07 $\pm$ 3.82  | 8.96 $\pm$ 3.41               | Normal vs. PIN (>0.99)<br>Normal vs. ADC (<0.01)<br>PIN vs. ADC (<0.01)      |
| Linoleic acid                    | 2.65 $\pm$ 1.61                                        | 2.94 $\pm$ 2.25  | 5.54 $\pm$ 2.36               | Normal vs. PIN (>0.99)<br>Normal vs. ADC (0.001)<br>PIN vs. ADC (<0.01)      |
| Linolenic acid                   | 0.53 $\pm$ 0.37                                        | 0.72 $\pm$ 0.81  | 2.52 $\pm$ 1.42               | Normal vs. PIN (>0.99)<br>Normal vs. ADC<br>(<0.001)<br>PIN vs. ADC (<0.001) |
| Dihomo- $\gamma$ -linolenic acid | 0.13 $\pm$ 0.05                                        | 0.12 $\pm$ 0.10  | 0.08 $\pm$ 0.04               | Normal vs. PIN (0.44)<br>Normal vs. ADC (0.01)<br>PIN vs. ADC (0.54)         |
| Arachidonic acid                 | 0.52 $\pm$ 0.19                                        | 0.53 $\pm$ 0.42  | 0.36 $\pm$ 0.28               | Normal vs. PIN (0.69)<br>Normal vs. ADC (0.03)<br>PIN vs. ADC (0.55)         |
| Eicosapentaenoic acid            | 0.09 $\pm$ 0.06                                        | 0.10 $\pm$ 0.07  | 0.14 $\pm$ 0.11               | Normal vs. PIN (>0.99)<br>Normal vs. ADC (0.66)<br>PIN vs. ADC (0.73)        |
| Docosapentaenoic acid            | 0.05 $\pm$ 0.02                                        | 0.05 $\pm$ 0.03  | 0.07 $\pm$ 0.06               | Normal vs. PIN (>0.99)<br>Normal vs. ADC (0.34)<br>PIN vs. ADC (0.53)        |
| Docosahexaenoic acid             | 0.18 $\pm$ 0.08                                        | 0.20 $\pm$ 0.18  | 0.22 $\pm$ 0.15               | Normal vs. PIN (>0.99)<br>Normal vs. ADC (>0.99)<br>PIN vs. ADC (>0.99)      |
| *SCD activity PLA/PA             | 0.05 $\pm$ 0.04                                        | 0.04 $\pm$ 0.02  | 0.07 $\pm$ 0.03               | Normal vs. PIN (0.73)<br>Normal vs. ADC (0.09)                               |

|                     |             |             |             |                                                                         |
|---------------------|-------------|-------------|-------------|-------------------------------------------------------------------------|
|                     |             |             |             | PIN vs. ADC (<0.01)                                                     |
| *SCD activity OA/SA | 1.62 ± 1.10 | 1.09 ± 0.64 | 2.30 ± 0.70 | Normal vs. PIN (0.29)<br>Normal vs. ADC (<0.05)<br>PIN vs. ADC (<0.001) |

Statistical significance was determined by one-way ANOVA followed by Kruskal-Wallis test.

\*SCD = Stearoyl-CoA desaturase-1; SCD activity PLA/PA = SCD activity palmitoleic acid/palmitic acid; SCD activity OA/SA = SCD activity oleic acid/stearic acid
